# Supplementary material for: Using Museum collections to assess the impact of industrialization on mussel (Mytilus edulis) calcification
Source: PLoS One. 2024 Apr 17;19(4):e0301874. doi: 10.1371/journal.pone.0301874 (PMC11023280; doi:10.1371/journal.pone.0301874)
Supplement: S1 Table — Computed tomography parameters (voltage, current, filter, voxel size, and ray detector) used for each mussel shell scanned. (XLSX) [file pone.0301874.s003.xlsx]

## Sheet: Sheet1
Sample	Site	Voltage (kV)	Current (nA)	Filter	Voxel size (mm)	X-ray tube (kV)
ME_1890_LINY_2	5	140	140	0.1 Cu	0.034	180
ME_1890_LINY_4	5	160	160	0.1 Cu	0.03	240
ME_1890_LINY_6	5	160	160	0.2 Cu	0.028	240
ME_1890_LINY_8	5	160	160	0.2 Cu	0.026	240
ME_1890_LINY_10	5	160	160	0.2 Cu	0.026	240
ME_1909_FRNY_2	5	150	130	0.1 Cu	0.03	180
ME_1909_FRNY_4	5	160	160	0.2 Cu	0.041	240
ME_1909_FRNY_6	5	160	160	0.2 Cu	0.041	240
ME_1910_VHMA_2	2	160	160	0.2 Cu	0.022	240
ME_1910_VHMA_4	2	150	130	0.1 Cu	0.026	180
ME_1911_ECMA_2	1	160	160	0.2 Cu	0.029	240
ME_1911_ECMA_4	1	160	160	0.2 Cu	0.022	240
ME_1911_ECMA_6	1	150	130	0.1 Cu	0.027	180
ME_1911_ECMA_8	1	160	160	0.2 Cu	0.023	240
ME_1912_WHMA_2	2	150	130	0.1 Cu	0.031	180
ME_1912_WHMA_4	2	160	160	0.2 Cu	0.029	240
ME_1913_WNY_2	4	150	130	0.1 Cu	0.03	180
ME_1913_WNY_4	4	160	160	0.2 Cu	0.023	240
ME_1915_BCNY_2	4	150	130	0.1 Cu	0.026	180
ME_1915_BCNY_4	4	160	160	0.1 Cu	0.023	240
ME_1961_LINY_2	4	160	160	0.1 Cu	0.042	240
ME_1961_LINY_4	4	160	160	0.2 Cu	0.04	240
ME_1961_LINY_6	4	160	160	0.2 Cu	0.39	240
ME_1961_LINY_8	4	160	160	0.2 Cu	0.39	240
ME_1961_LINY_10	4	160	160	0.2 Cu	0.36	240
ME_1961_RBNJ_2	5	150	130	0.1 Cu	0.03	180
ME_1961_RBNJ_4	5	160	160	0.2 Cu	0.04	240
ME_1961_RBNJ_6	5	160	160	0.2 Cu	0.032	240
ME_1961_RBNJ_8	5	160	160	0.2 Cu	0.049	240
ME_1962_CT_2	4	160	160	0.2 Cu	0.033	240
ME_1962_CT_4	4	160	160	0.1 Cu	0.033	240
ME_1962_CT_6	4	160	160	0.2 Cu	0.039	240
ME_1962_CT_8	4	160	160	0.2 Cu	0.036	240
ME_1963_LINY_2	3	160	160	0.1 Cu	0.042	240
ME_1963_LINY_4	3	160	160	0.2 Cu	0.04	240
ME_1963_OBNY_2	4	160	160	0.1 Cu	0.029	240
ME_1963_OBNY_4	4	160	160	0.2 Cu	0.023	240
ME_1963_OBNY_6	4	160	160	0.2 Cu	0.03	240
ME_1963_OBNY_8	4	160	160	0.2 Cu	0.0023	240
ME_1963_OBNY_10	4	160	160	0.2 Cu	0.028	240
ME_1964_LBMA_2	2	140	130	0.1 Cu	0.017	240
ME_1964_LBMA_4	2	160	160	0.2 Cu	0.029	240
ME_1964_LBMA_6	2	160	160	0.2 Cu	0.029	240
ME_1964_LBMA_8	2	150	150	0.2 Cu	0.019	240
ME_1964_LBMA_10	2	160	160	0.2 Cu	0.023	240
ME_2021_BBNY_2	5	160	160	0.1 Cu	0.029	240
ME_2021_BBNY_4	5	160	160	0.2 Cu	0.03	240
ME_2021_BBNY_6	5	160	160	0.2 Cu	0.027	240
ME_2021_BBNY_8	5	160	160	0.2 Cu	0.029	240
ME_2021_BBNY_10	5	160	160	0.2 Cu	0.029	240
ME_2021_CINY_2	5	160	160	0.1 Cu	0.023	240
ME_2021_CINY_4	5	160	160	0.2 Cu	0.027	240
ME_2021_CINY_6	5	160	160	0.2 Cu	0.03	240
ME_2021_CINY_8	5	160	160	0.2 Cu	0.029	240
ME_2021_CINY_10	5	160	160	0.2 Cu	0.029	240
ME_2021_FRNY_2	5	160	160	0.1 Cu	0.028	240
ME_2021_FRNY_4	5	160	160	0.2 Cu	0.032	240
ME_2021_FRNY_6	5	160	160	0.2 Cu	0.03	240
ME_2021_FRNY_8	5	160	160	0.2 Cu	0.029	240
ME_2021_FRNY_10	5	160	160	0.2 Cu	0.029	240
ME_2021_LINY_2	3	160	160	0.1 Cu	0.036	240
ME_2021_LINY_4	3	160	160	0.2 Cu	0.032	240
ME_2021_LINY_7	3	160	160	0.2 Cu	0.026	240
ME_2021_LINY_8	3	160	160	0.2 Cu	0.026	240
ME_2022_BBMA_2	2	160	160	0.2 Cu	0.03	240
ME_2022_BBMA_4	2	160	160	0.2 Cu	0.04	240
ME_2022_BBMA_6	2	160	160	0.2 Cu	0.027	240
ME_2022_BBMA_8	2	160	160	0.2 Cu	0.032	240
ME_2022_BBMA_10	2	160	160	0.2 Cu	0.049	240
ME_2022_GIMA_2	2	160	160	0.2 Cu	0.026	240
ME_2022_GIMA_4	2	160	160	0.2 Cu	0.026	240
ME_2022_OBNY_2	4	160	160	0.2 Cu	0.028	240
ME_2022_OBNY_4	4	160	160	0.2 Cu	0.031	240
ME_2022_OBNY_6	4	160	160	0.2 Cu	0.024	240
ME_2022_SHNJ_4	5	160	160	0.1 Cu	0.023	240
ME_2022_SHNJ_8	5	160	160	0.2 Cu	0.036	240
ME_2022_SHNJ_10	5	160	160	0.2 Cu	0.031	240
ME_2022_SICT_2	4	160	160	0.2 Cu	0.033	240
ME_2022_SICT_2	4	160	160	0.1 Cu	0.035	240
ME_2022_SICT_4	4	160	160	0.2 Cu	0.043	240
ME_2022_SICT_6	4	160	160	0.2 Cu	0.031	240
ME_2022_SICT_6	4	160	160	0.2 Cu	0.039	240
ME_2022_SICT_8	4	160	160	0.2 Cu	0.036	240
ME_2023_SICT_10	4	160	160	0.2 Cu	0.036	240
ME_2023_CBMA_2	1	160	160	0.2 Cu	0.33	240
ME_2023_CBMA_4	1	160	160	0.2 Cu	0.03	240
ME_2023_CBMA_6	1	160	160	0.2 Cu	0.032	240
ME_2023_CBMA_8	1	160	160	0.2 Cu	0.03	240
ME_2023_CBMA_10	1	160	160	0.2 Cu	0.032	240
ME_2023_LCMA_2	2	160	160	0.2 Cu	0.033	240
ME_2023_LCMA_4	2	160	160	0.2 Cu	0.033	240
ME_2023_LCMA_6	2	160	160	0.2 Cu	0.033	240
ME_2023_LCMA_8	2	160	160	0.2 Cu	0.033	240
ME_2023_LCMA_10	2	160	160	0.2 Cu	0.032	240
ME_2023_LTMA_2	2	160	160	0.2 Cu	0.031	240
ME_2023_LTMA_4	2	160	160	0.2 Cu	0.031	240
ME_2023_LTMA_6	2	160	160	0.2 Cu	0.029	240
ME_2023_LTMA_8	2	160	160	0.2 Cu	0.33	240
ME_2023_LTMA_10	2	160	160	0.2 Cu	0.032	240
ME_2023_MBMA_2	2	160	160	0.2 Cu	0.028	240
ME_2023_MBMA_4	2	160	160	0.2 Cu	0.03	240
ME_2023_MBMA_6	2	160	160	0.2 Cu	0.03	240
ME_2023_MBMA_8	2	160	160	0.2 Cu	0.028	240
ME_2023_MBMA_10	2	160	160	0.2 Cu	0.028	240
aCopper (Cu)
